# Supplementary material for: Vascular and Liver Homeostasis in Juvenile Mice Require Endothelial Cyclic AMP-Dependent Protein Kinase A
Source: MDPI journal article supplement (doi:10.3390/ijms231911419), 2022-09-27
Supplement: s1 [file s1]

Figure S1: Subcutaneous edema in dnPKA<sup>iEC</sup> mice.

Video S1: MRI imaging of control and dnPKA<sup>iEC</sup> littermates demonstrate subcutaneous edema in dnPKA<sup>iEC</sup> mouse.

Figure S2: Hypervascularization of inguinal fat pad in dnPKA<sup>iEC</sup> mice.

Figure S3: Cdh5-CreERT2- and Vegfr3-CreERT2-induced recombination in the liver.

Figure S4: Disorganization of the hepatic vasculature in the liver of dnPKA<sup>iEC</sup> mice.
